# Supplementary material for: Acclimation Strategy of Masson Pine (Pinus massoniana) by Limiting Flavonoid and Terpenoid Production under Low Light and Drought
Source: MDPI journal article supplement (doi:10.3390/ijms23158441), 2022-07-29
Supplement: s1 [file s1]

**Table S2.** The differences of photosynthetic parameters in Masson pine seedlings under shade and drought treatments. CK: control; LL: Low light; DR: drought; DL (DR+LL): the combined stress of drought and low light. P<sub>n</sub>, net photosynthesis rate; G<sub>s</sub>, stomatal conductance; C<sub>i</sub>, intercellular CO<sub>2</sub> concentration; Tr, transpiration rate; WUE, water use efficiency; L<sub>s</sub>, stomatal limitation. The lowercase letter represented the significance of difference at  $P<0.05$  level among the treatments.

| Indexes                                                 | CK            | LL            | DR            | DL            |
|---------------------------------------------------------|---------------|---------------|---------------|---------------|
| P <sub>n</sub> (μmol·m <sup>-2</sup> ·s <sup>-1</sup> ) | 14.82±1.03a   | 8.56±0.63b    | 9.26±1.62b    | 5.25±0.78c    |
| G <sub>s</sub> (μmol·m <sup>-2</sup> ·s <sup>-1</sup> ) | 0.36±0.05a    | 0.18±0.04b    | 0.09±0.03c    | 0.05±0.02c    |
| C <sub>i</sub> (μmol·m <sup>-2</sup> ·s <sup>-1</sup> ) | 307.79±11.72a | 307.43±12.04a | 212.09±37.67b | 213.77±39.31b |
| T <sub>r</sub> (μmol·m <sup>-2</sup> ·s <sup>-1</sup> ) | 3.97±0.32a    | 2.38±0.36b    | 1.51±0.42c    | 0.9±0.26d     |
| WUE (μmol·mmol <sup>-1</sup> )                          | 3.75±0.42b    | 3.63±0.3b     | 6.29±0.87a    | 6.03±1.1a     |
| L <sub>s</sub>                                          | 0.21±0.03b    | 0.22±0.03b    | 0.47±0.1a     | 0.46±0.1a     |
