# Supplementary material for: Acclimation Strategy of Masson Pine (Pinus massoniana) by Limiting Flavonoid and Terpenoid Production under Low Light and Drought
Source: MDPI journal article supplement (doi:10.3390/ijms23158441), 2022-07-29
Supplement: s1 [file s1]

**Table S9.** Changes in  $\delta^{13}\text{C}$  values in the different  $^{13}\text{C}$  labelling times from each tissue under four treatments. CK: Control; LL: Low light; DR: Drought; DL (DR+LL): the combined stress of drought and low light. The samples were harvested at 1 d before labelling (0 d), and 1, 5, 10, 21, and 30 d after labelling.

|                     |    | 0 d       | 1 d        | 5 d        | 10 d       | 21 d       | 30 d       |
|---------------------|----|-----------|------------|------------|------------|------------|------------|
| Current-year leaves | CK | -28.4±0.3 | 523.1±69.7 | 261.7±81.6 | 201.3±13.7 | 165.2±22.0 | 131.2±34.1 |
|                     | LL | -30.0±0.4 | 441.7±21.5 | 196.3±21.9 | 251.5±49.5 | 177.9±26.7 | 184.9±24.7 |
|                     | DR | -24.3±2.5 | 507.1±11.0 | 150.8±21.3 | 216.8±44.5 | 194.8±26.5 | 148.3±57.0 |
|                     | DL | -28.4±0.2 | 430.8±92.2 | 248.1±25.6 | 206.1±10.8 | 139.0±37.1 | 150.0±9.9  |
| One-year leaves     | CK | -28.6±0.4 | 376.5±49.5 | 118.1±12.7 | 136.9±9.6  | 75.3±20.9  | 81.5±9.2   |
|                     | LL | -29.8±0.8 | 371.4±64.6 | 122.5±17.6 | 97.3±6.6   | 55.2±4.8   | 56.0±15.2  |
|                     | DR | -28.2±0.6 | 347.4±36.3 | 48.4±7.5   | 49.5±19.0  | 32.5±8.7   | 18.1±4.1   |
|                     | DL | -29.3±0.9 | 354.9±38.9 | 230.7±63.4 | 76.9±6.9   | 89.9±11.4  | 72.4±14.6  |
| Branch              | CK | -24.4±1.8 | 245.4±48.6 | 258.9±11.3 | 161.8±34.6 | 143.2±25   | 93.9±3.1   |
|                     | LL | -26.5±1.1 | 240.3±74.6 | 214.5±14.2 | 180.9±25.5 | 97.7±8.7   | 132.0±51.1 |
|                     | DR | -24.0±0.8 | 233.2±52.4 | 77.8±16.2  | 79.3±12.5  | 65.1±20.1  | 65.5±16.4  |
|                     | DL | -25.9±1.2 | 208.4±2.9  | 147.7±10.4 | 121.1±16.5 | 151.4±53.5 | 120.0±28.7 |
| Stem                | CK | -25.9±0.6 | 191.0±33.0 | 152.3±13.8 | 113.7±8.7  | 119.2±20.8 | 133.6±14   |
|                     | LL | -27.3±0.5 | 126.3±4.6  | 153.2±6.7  | 148.5±46.5 | 96.8±6.9   | 110.8±15.9 |
|                     | DR | -24.8±1.4 | 184.2±15.0 | 121.3±19.5 | 70.7±18.0  | 94.5±12.2  | 65.3±14.5  |
|                     | DL | -26.8±0.6 | 153.0±22.8 | 181.2±11.4 | 131.7±9.6  | 121.1±33.8 | 78.9±11.3  |
| Root                | CK | -25.8±1.1 | 148.0±40.3 | 118.5±10.2 | 79.1±8.3   | 73.1±9.5   | 90.9±3.2   |
|                     | LL | -26.0±0.5 | 66.1±16.7  | 118.9±11.9 | 112.7±23.2 | 121.9±28.3 | 126.8±47.7 |
|                     | DR | -24.6±0.9 | 138.1±20.6 | 114.3±16.4 | 66.2±13.6  | 48.7±6.2   | 56.0±18    |
|                     | DL | -26.4±0.8 | 49.0±13.7  | 102.7±9.5  | 93.8±20.4  | 74.2±5.6   | 82.9±14.6  |
